# Supplementary material for: Clouds influence the functioning of airborne microorganisms
Source: Copernicus journal article supplement (doi:10.5194/bg-22-1257-2025), 2025-03-06
Supplement: Supplementary file 1 [file bg-22-1257-2025-supplement.pdf]

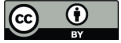

*Supplement of*

## **Clouds influence the functioning of airborne microorganisms**

**Raphaëlle Péguilhan et al.**

*Correspondence to:* Pierre Amato ([pierre.amato@uca.fr](mailto:pierre.amato@uca.fr))

The copyright of individual parts of the supplement might differ from the article licence.

## Supplementary text and references (Materials and methods)

### Bioinformatic workflow, differential expression analyses and data visualization

The bioinformatics workflow was elaborated by assembling relevant existing tools on a Galaxy instance (The Galaxy Community, 2022) deployed by the University Clermont Auvergne bioinformatics facility.

The preprocessing step consisted of (i) FastQC (v 0.72) (Andrews, 2010) for quality control analysis, (ii) Trimmomatic (v 0.36.6) (Bolger et al., 2014) to filter and trim erroneous reads, with an initial ILLUMINACLIP step for removing remaining Nextera paired-reads adapters, with a sliding window of 10:30, a minimum read length of 100 bp and the leading and trailing parameters with a quality threshold at 30. This step removed between 26% and 37 % of the reads in MGs (**Table S2**) and between 20 to 49 % of the reads in MTs (**Table S3**). Taxonomic affiliations were obtained from whole MG and MT datasets using Kraken2 (v 2.1.1) (Wood and Salzberg, 2014) against the “PlusPF” Kraken database (as of 2021-1-27) including known archaeal, bacterial, viral plasmid, human, protozoan, and fungal genomes, with a confidence score threshold of 0.1 and with the “report” and “report-zero-counts” options on. The trimmed reads were screened with SortMeRNA (v 2.1b.6) (Kopylova et al., 2012) to filter and recover the rRNA gene reads in separated files, with the default parameters, “paired-out” option, and all the available databases. Non-rRNA gene reads were processed for functional analyses. The proportions of rRNA gene reads in MG and MT datasets were generally between 1-2 % and 80-94%, respectively. Sample 20201124AIR’s MT consisted of only 12% rRNA gene reads and was therefore excluded from further analysis (**Tables S2-S3**). Human reads were filtered from the non-rRNA gene reads using Bowtie2 (v 2.4.2) (Langmead and Salzberg, 2012), against the NCBI *Homo sapiens* genome “hg38\_2021-5-18” with default parameters (**Tables S2-S3**). Human reads were excluded from further analyses.

To create a reference for all data, a non-redundant gene catalog was built using MGs (**Fig. S2**). Each individual dataset of non-RNA reads in MGs (each sample) was first *de novo* assembled using MEGAHIT (v 1.1.3.5) (Li et al., 2015), with default parameters and a minimum contig length of 500 bp. Depending on the sample, the number of assembled contigs ranged from ~43 000 to ~495 000 (**Table S2**), leading to 2 832 534 contigs with a maximal length of 21 000 to 200 000 bp, and a mean size of ~750 to 1 010 bp depending on samples. Genes were then predicted from these contigs using MetaGeneAnnotator (v 1.0.0) (Noguchi et al., 2008), with the “MetaGenomic” option and BED format as the output file. From the 2 832 534 contigs, 3 168 750 genes were predicted. Finally, to prevent redundancy, gene sequences were clustered at 95 % identity using CD-HIT (v 4.8.1) (Fu et al., 2012; Li and Godzik, 2006) and only the representative sequences for each cluster were kept. Only sequences >100 bp, and exhibiting >90 % identity with a reference sequence were kept. In total, 1 067 351 non-redundant genes were finally kept, with sequence length ranging from 100 to 22 065 bp and an average size of 330 bp. Functional annotation of the gene catalog was performed using DIAMOND (v 2.0.8.0) (Buchfink et al., 2015) in the “blastx” mode, with default parameters and the UniProtKB Swiss-Prot functional gene database (as of

2021\_03) (The UniProt Consortium, 2019): 163 057 genes could be annotated, representing 40 264 unique UniProtKB entries, *i.e.*, ~7 % of the total number of entries in this database, illustrating the high biological diversity circulating in the atmosphere. Most (91.5 %) annotated genes are related to eukaryotes (~60 % to fungi), 23.6 % to viridiplantae, and 14.3 % to metazoa. Bacteria, viruses and archaea contributed 7.6 %, 0.6 %, and 0.3 % of the annotated genes, respectively.

Non-rRNA gene sequences from all MGs and MTs were finally mapped to the gene catalog to obtain read counts per gene using BWA-MEM (v 0.7.17.1) (Li and Durbin, 2009) with default parameters. Percentages of properly mapped reads against the gene catalog ranged between ~4 % and ~17 % for MGs and between ~3% and ~10% for MTs (**Tables S2-S3**). Only genes with >10 mapped sequences in MGs were considered, and the count tables for MGs and MTs were filtered in order to remove genes affiliated with “Embryophytes” and “Metazoa” and focus on microbial genes. Finally, unique 21 046 unique microbial genes (over 40 264 in total) were retained for downstream analyses. Annotated sequences were grouped according to their respective Gene Ontology terms (GOs) (Ashburner et al., 2000; The Gene Ontology Consortium, 2021).

Data normalization and differential expression analysis (DEA) were performed using the R package MTXmodel (R v4.0.3; MTXmodel v1.5.1) (Zhang et al., 2021). To highlight overall functional expression patterns independently from atmospheric conditions, this was run using the following options, with MT and MG datasets as the input files consisted of: no transformation, clr (centered-log ratio) normalization, LM analysis method, BH correction method, min abundance at 0.0001, min prevalence at 0.5, max significance at 0.25, and “DataType” (*i.e.*, MTs or MGs) as a fixed effect. DEA provides relative expression coefficients based on the selected fixed effect. Positive coefficients (coeff) here indicate features (taxonomic groups or genes) significantly more represented in MTs than in MGs, while negative coefficients indicate overrepresentation in MGs (*i.e.*, no significant expression), with higher absolute values for higher representations.

To identify the functions and genes whose expression was related to atmospheric conditions, “EnvType” was selected as the fixed effect (cloud or clear condition), with MTs as input files, and MGs as “DNA data” for normalization. The environment type “cloud” was used as the reference, so positive coefficients (coeff) here indicate the features significantly more expressed in clouds compared with clear conditions, and the opposite for negative values.

Data visualizations were designed with the following R packages: *ggplot2* (v3.4.1), *ggrepel* (v0.9.3), *ggsignif* (v0.6.4), *ggdendro* (v0.1.23), *factoextra* (v1.0.7), *gridExtra* (v2.3), *vegan* (v2.6-4), *pheatmap* (v1.0.12). Relationship networks for GOs were generated using OLSVis (Vercruyssen et al., 2012) and Cytoscape (v3.9.1). Metabolic pathways were generated from KEGG database (Kanehisa et al., 2023).

## References cited:

Andrews, S.: FastQC: a quality control tool for high throughput sequence data, 2010.  
Ashburner, M., Ball, C. A., Blake, J. A., Botstein, D., Butler, H., Cherry, J. M., Davis, A. P., Dolinski, K., Dwight, S. S., Eppig, J. T., Harris, M. A., Hill, D. P., Issel-Tarver, L., Kasarskis, A., Lewis, S., Matese, J. C., Richardson, J. E., Ringwald, M., Rubin, G. M., and Sherlock, G.:

Gene ontology: tool for the unification of biology. The Gene Ontology Consortium, *Nature Genetics*, 25, 25–29, <https://doi.org/10.1038/75556>, 2000.

Bolger, A. M., Lohse, M., and Usadel, B.: Trimmomatic: a flexible trimmer for Illumina sequence data, *Bioinformatics*, 30, 2114–2120, <https://doi.org/10.1093/bioinformatics/btu170>, 2014.

Buchfink, B., Xie, C., and Huson, D. H.: Fast and sensitive protein alignment using DIAMOND, *Nature Methods*, 12, 59–60, <https://doi.org/10.1038/nmeth.3176>, 2015.

Fu, L., Niu, B., Zhu, Z., Wu, S., and Li, W.: CD-HIT: accelerated for clustering the next-generation sequencing data, *Bioinformatics*, 28, 3150–3152, <https://doi.org/10.1093/bioinformatics/bts565>, 2012.

Kanehisa, M., Furumichi, M., Sato, Y., Kawashima, M., and Ishiguro-Watanabe, M.: KEGG for taxonomy-based analysis of pathways and genomes, *Nucleic Acids Research*, 51, D587–D592, <https://doi.org/10.1093/nar/gkac963>, 2023.

Kopylova, E., Noé, L., and Touzet, H.: SortMeRNA: fast and accurate filtering of ribosomal RNAs in metatranscriptomic data, *Bioinformatics*, 28, 3211–3217, <https://doi.org/10.1093/bioinformatics/bts611>, 2012.

Langmead, B. and Salzberg, S. L.: Fast gapped-read alignment with Bowtie 2, *Nature Methods*, 9, 357–359, <https://doi.org/10.1038/nmeth.1923>, 2012.

Li, D., Liu, C.-M., Luo, R., Sadakane, K., and Lam, T.-W.: MEGAHIT: an ultra-fast single-node solution for large and complex metagenomics assembly via succinct de Bruijn graph, *Bioinformatics*, 31, 1674–1676, <https://doi.org/10.1093/bioinformatics/btv033>, 2015.

Li, H. and Durbin, R.: Fast and accurate short read alignment with Burrows–Wheeler transform, *Bioinformatics*, 25, 1754–1760, <https://doi.org/10.1093/bioinformatics/btp324>, 2009.

Li, W. and Godzik, A.: Cd-hit: a fast program for clustering and comparing large sets of protein or nucleotide sequences, *Bioinformatics*, 22, 1658–1659, <https://doi.org/10.1093/bioinformatics/btl158>, 2006.

Noguchi, H., Taniguchi, T., and Itoh, T.: MetaGeneAnnotator: Detecting Species-Specific Patterns of Ribosomal Binding Site for Precise Gene Prediction in Anonymous Prokaryotic and Phage Genomes, *DNA Research*, 15, 387–396, <https://doi.org/10.1093/dnares/dsn027>, 2008.

The Galaxy Community: The Galaxy platform for accessible, reproducible and collaborative biomedical analyses: 2022 update, *Nucleic Acids Research*, 50, W345–W351, <https://doi.org/10.1093/nar/gkac247>, 2022.

The Gene Ontology Consortium: The Gene Ontology resource: enriching a GOLD mine, *Nucleic Acids Research*, 49, D325–D334, <https://doi.org/10.1093/nar/gkaa1113>, 2021.

The UniProt Consortium: UniProt: a worldwide hub of protein knowledge, *Nucleic Acids Research*, 47, D506–D515, <https://doi.org/10.1093/nar/gky1049>, 2019.

Vercruyssen, S., Venkatesan, A., and Kuiper, M.: OLSVis: an animated, interactive visual browser for bio-ontologies, *BMC Bioinformatics*, 13, 116, <https://doi.org/10.1186/1471-2105-13-116>, 2012.

Wood, D. E. and Salzberg, S. L.: Kraken: ultrafast metagenomic sequence classification using exact alignments, *Genome Biology*, 15, R46, <https://doi.org/10.1186/gb-2014-15-3-r46>, 2014.

Zhang, Y., Thompson, K. N., Huttenhower, C., and Franzosa, E. A.: Statistical approaches for differential expression analysis in metatranscriptomics, *Bioinformatics*, 37, i34–i41, <https://doi.org/10.1093/bioinformatics/btab327>, 2021.

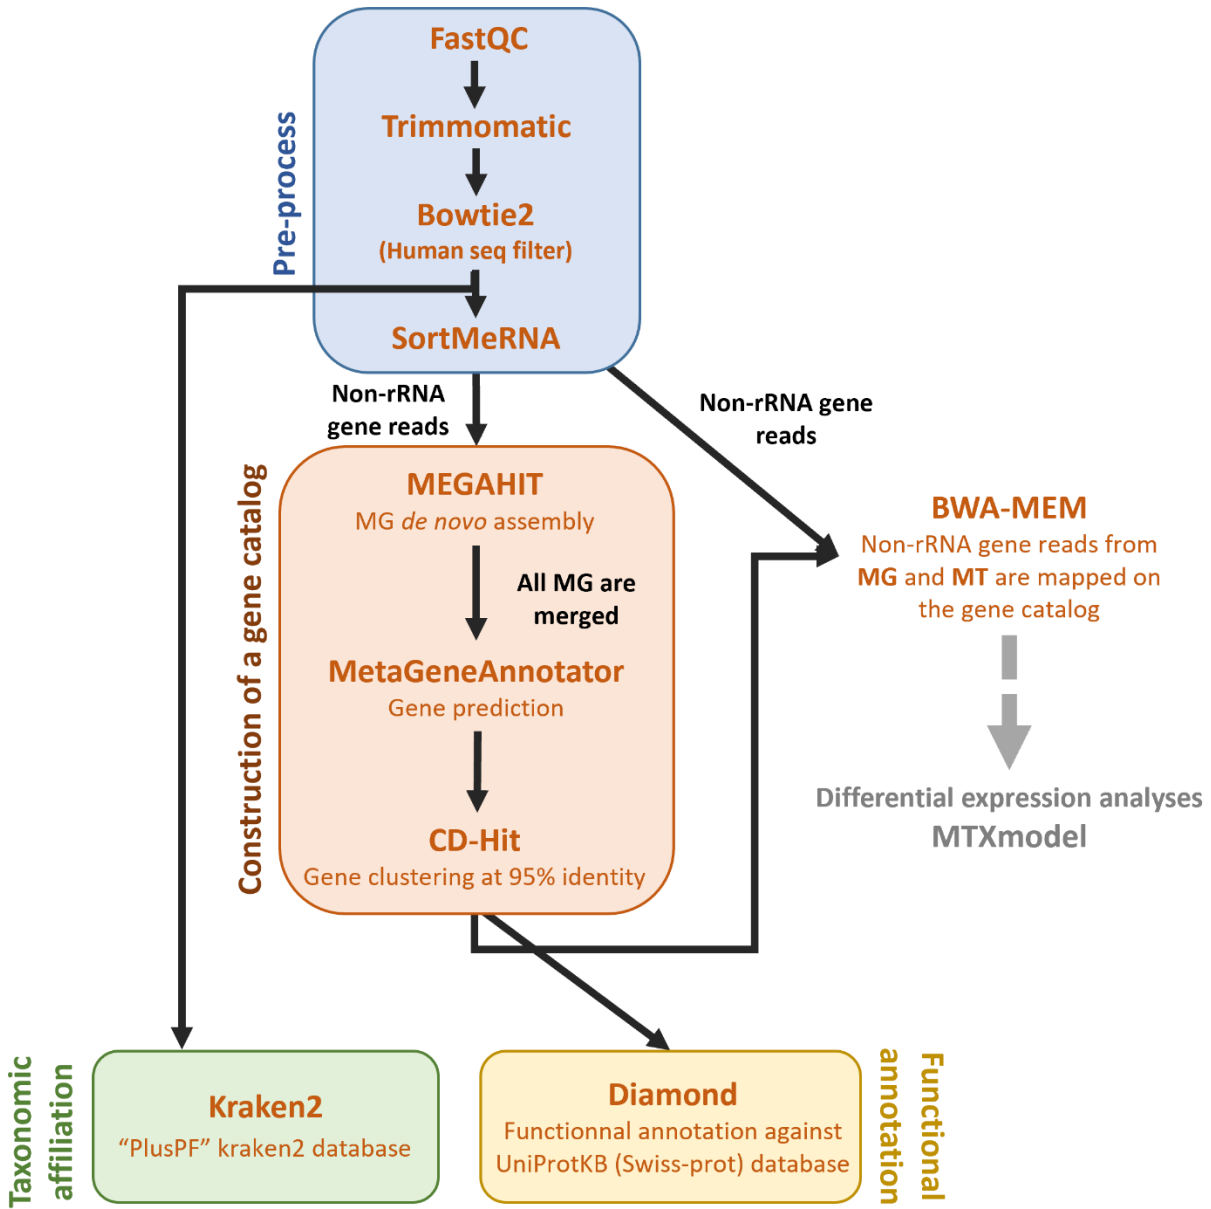

**Fig S1.**

Main steps of the bioinformatics workflow elaborated for this study. This uses the following tools, on a Galaxy environment: FastQC (v0.72), Trimmomatic (v0.36.6), Bowtie2 (v2.4.2), SortMeRNA (v2.1b.6), MEGAHIT (v1.1.3.5), MetaGeneAnnotator (v1.0.0), CD-Hit (v4.8.1), Kraken2 (v2.11), Diamond (v2.0.8.0), BWA-MEM (v0.7.17.1), and the MTXmodel R package (v1.5.1) (see supplementary text for references).

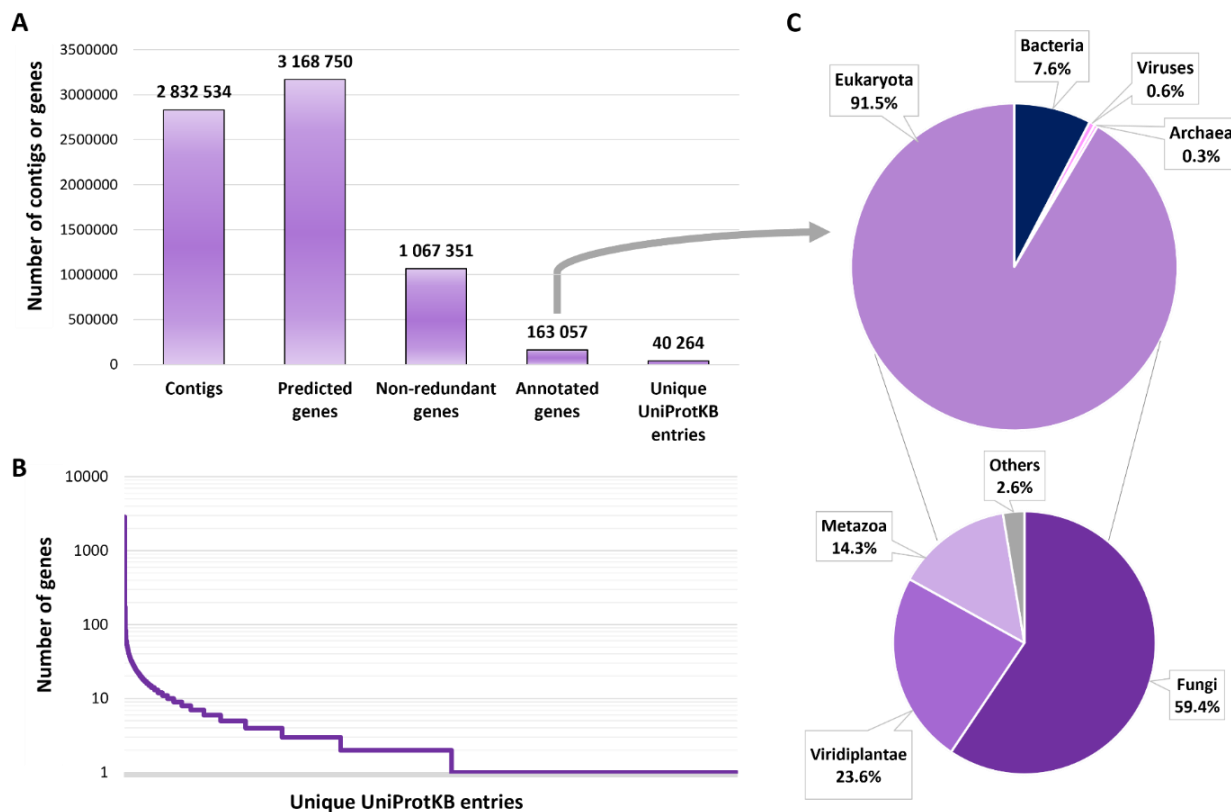

**Fig S2.**

Content of the gene catalog used as a common reference to all datasets, elaborated by merging all the metagenomes of the study and curated for redundancy. **A.** Contig or gene numbers at each step of the gene catalog construction, from left to right; **B.** Rank-abundance plot representing the number of genes associated with unique UniProtKB entries; **C.** Taxonomic affiliations associated with annotated genes; the taxa distribution in Eukaryotes is specified in the lower pie-chart.

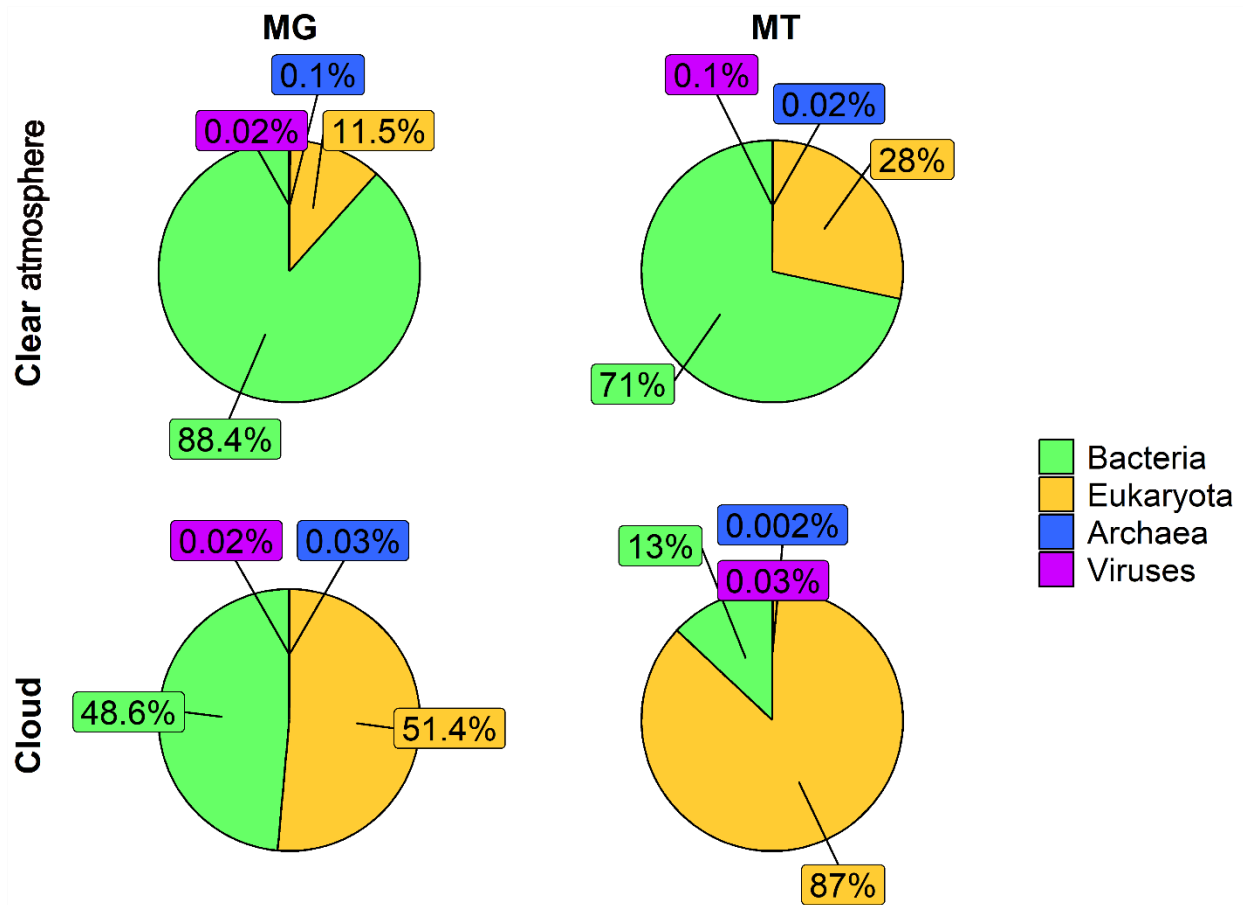

**Fig S3.**

Average proportions of reads associated with Bacteria, Eukaryota, Archaea, and Viruses in metagenomes (MG, left) and metatranscriptomes (MT, right), during cloudy (lower charts) and clear conditions (upper charts).



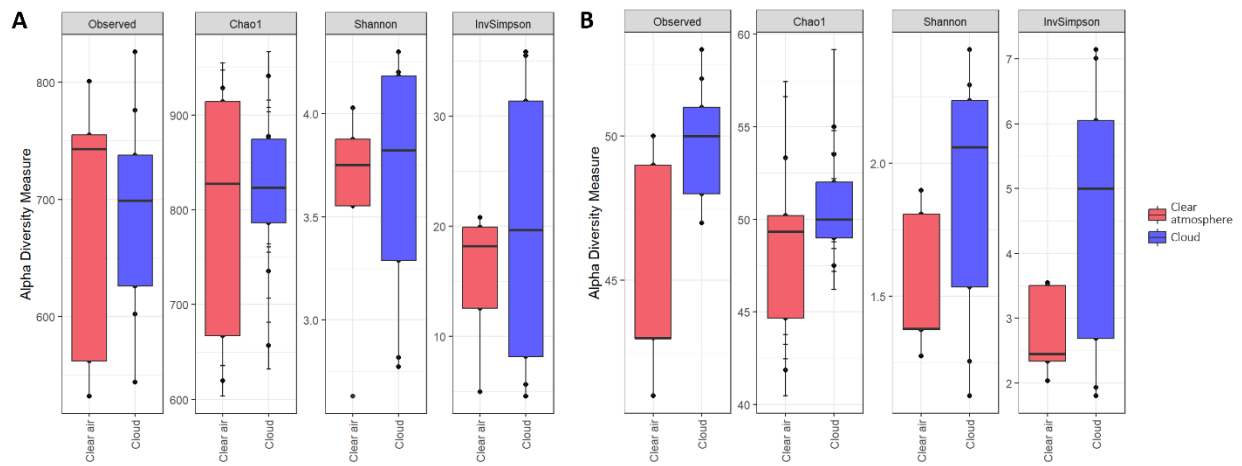

**Fig S4.**

Alpha diversity indexes (observed and estimated richness, Shannon's diversity and Inverse Simpson's evenness) in clear atmosphere and cloud metagenomes at the genus level for **(A)** bacteria and **(B)** eukaryotes.

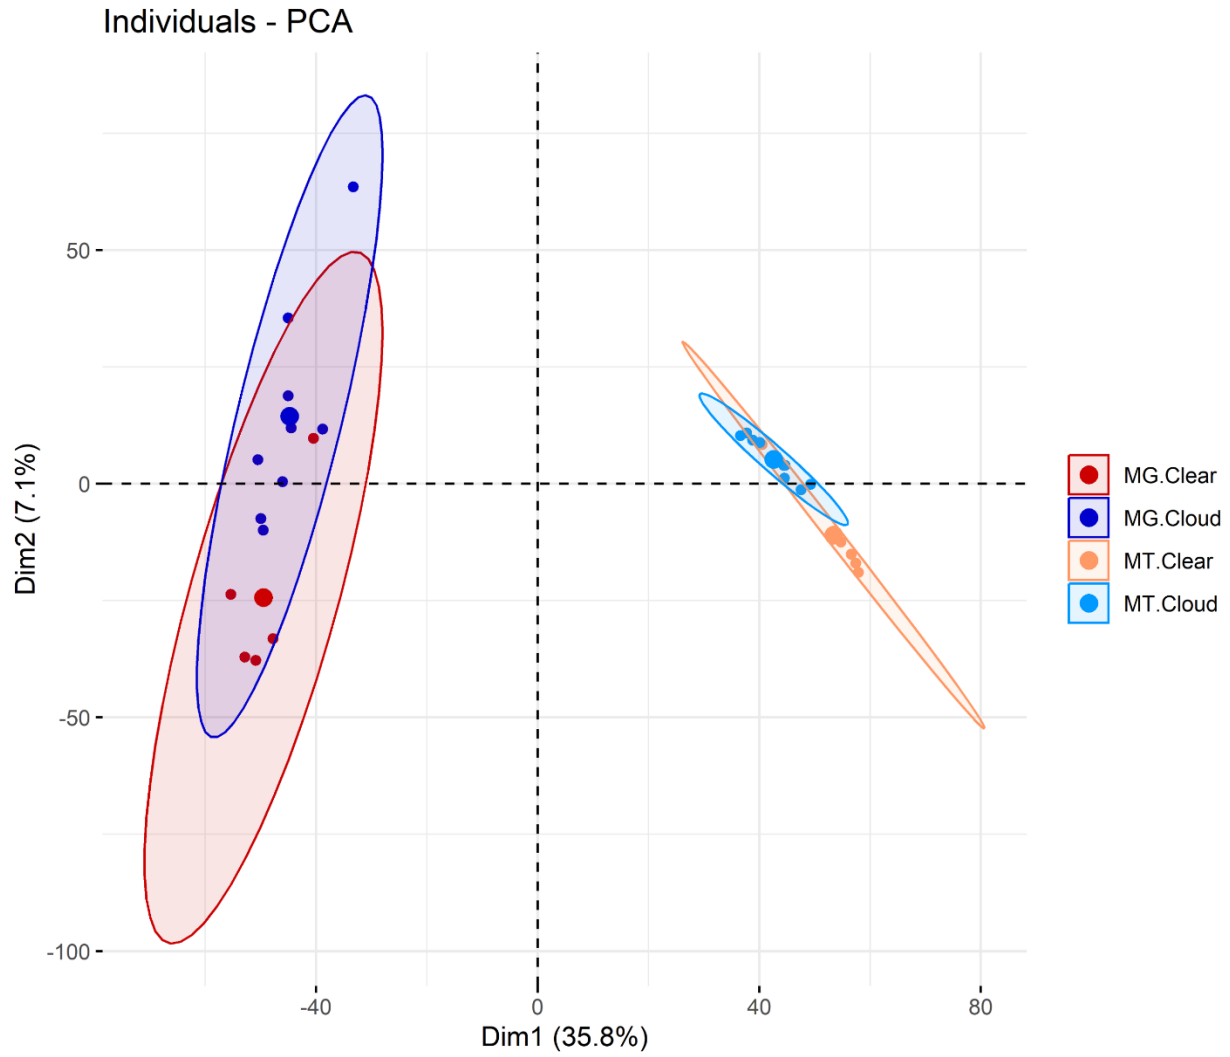

**Fig S5.**

Principal component analysis (PCA) representing taxonomy distribution in metagenomes (MG) and metatranscriptomes (MT) for clouds and clear atmospheric conditions, based on 6 373 unique taxa. Count data were centered-log ratio (clr) transformed. Ellipses indicate 95% confidence levels.

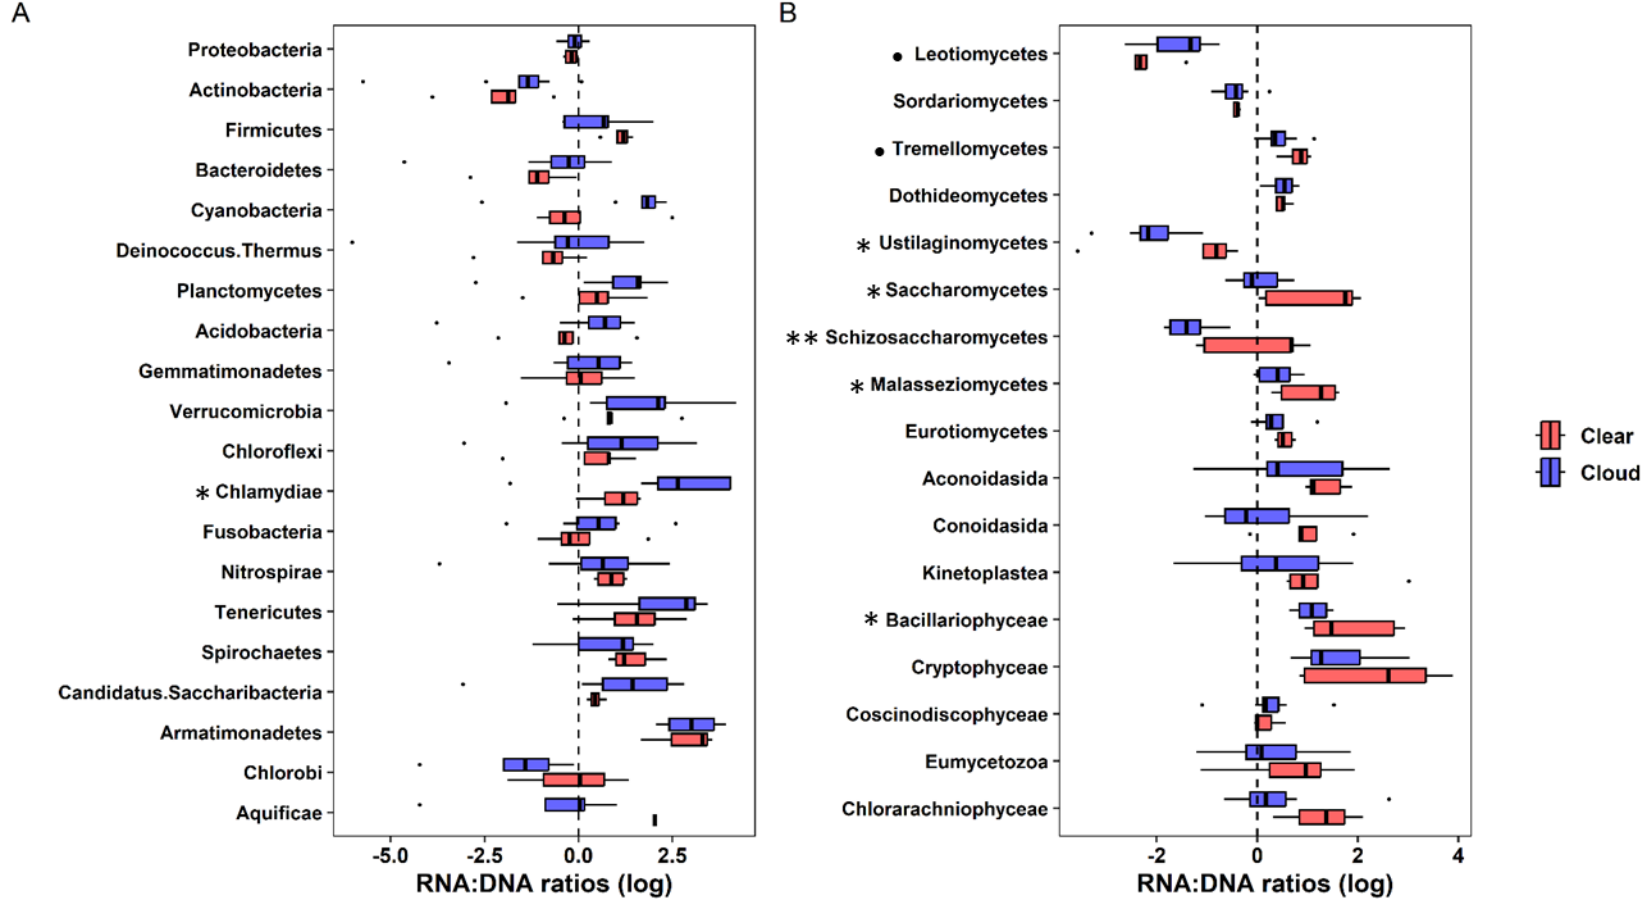

**Fig S6.**

Relative representation of annotated microbial taxa in metatranscriptomes compared with metagenomes (termed as RNA:DNA ratio) in clouds (blue) and in clear atmospheric conditions (red) for **(A)** the 20 most represented phyla of bacteria and **(B)** classes of eukaryotes. Taxa are ordered in descending order of the number of reads in metagenomes, from top to bottom. P-value:  $0 < *** < 0.001 \leq ** < 0.01 \leq * < 0.05 \leq \bullet < 0.1$  (calculated using *indicspecies* R package, “r.g” method).

A

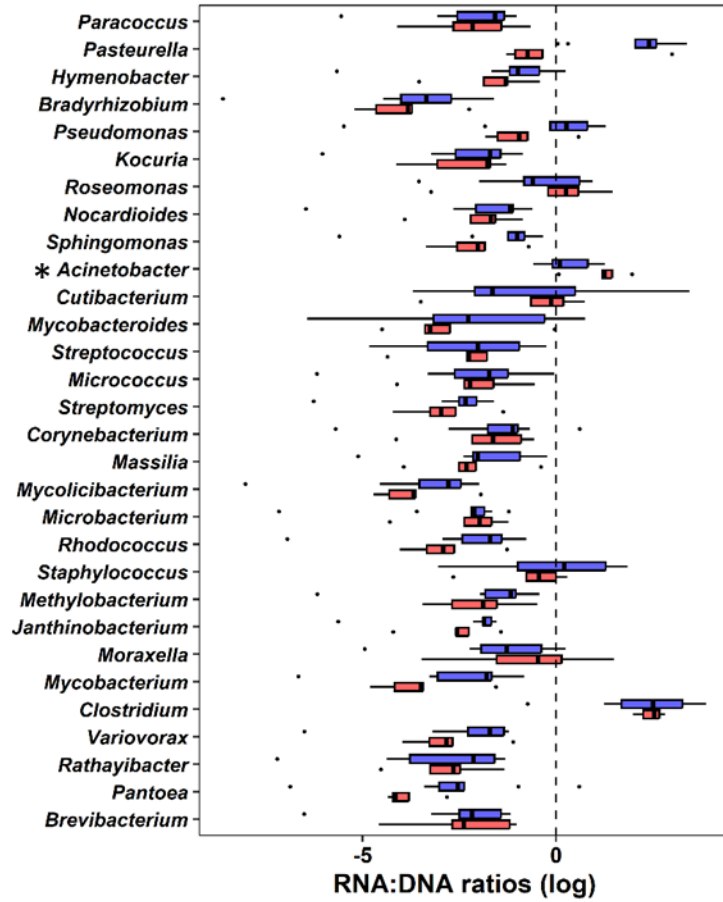

B

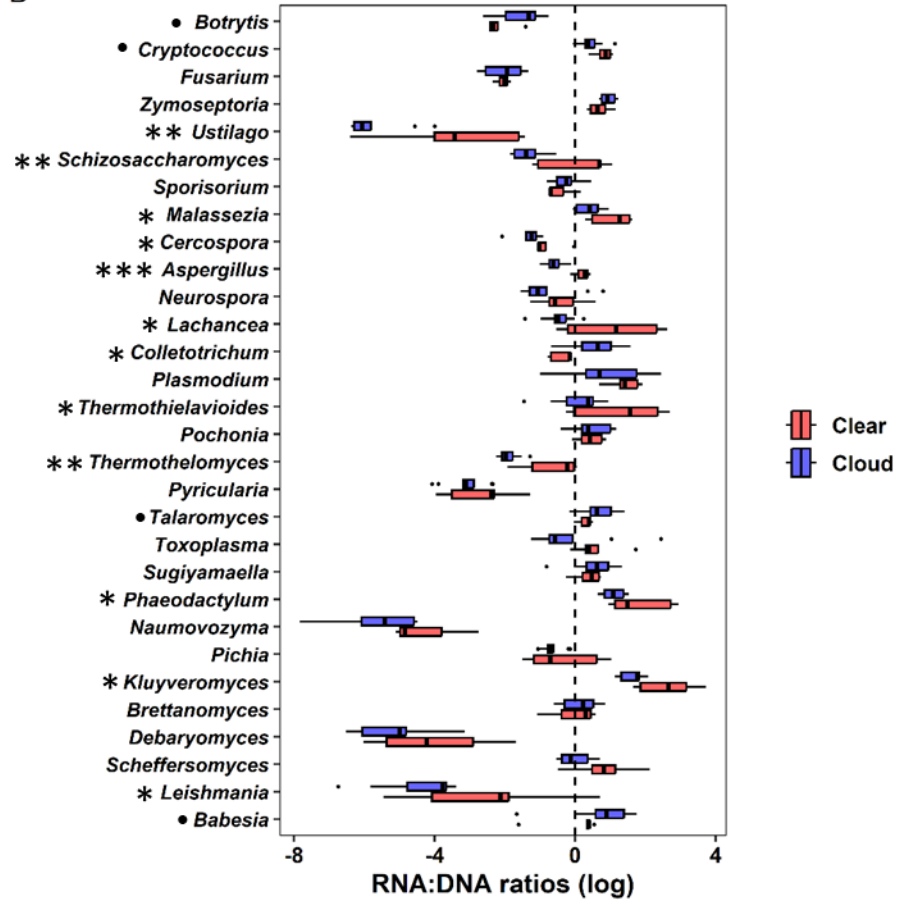

Fig S7.

Same as Fig S6, at the genus levels for (A) bacteria (30 most represented) and (B) eukaryotes.

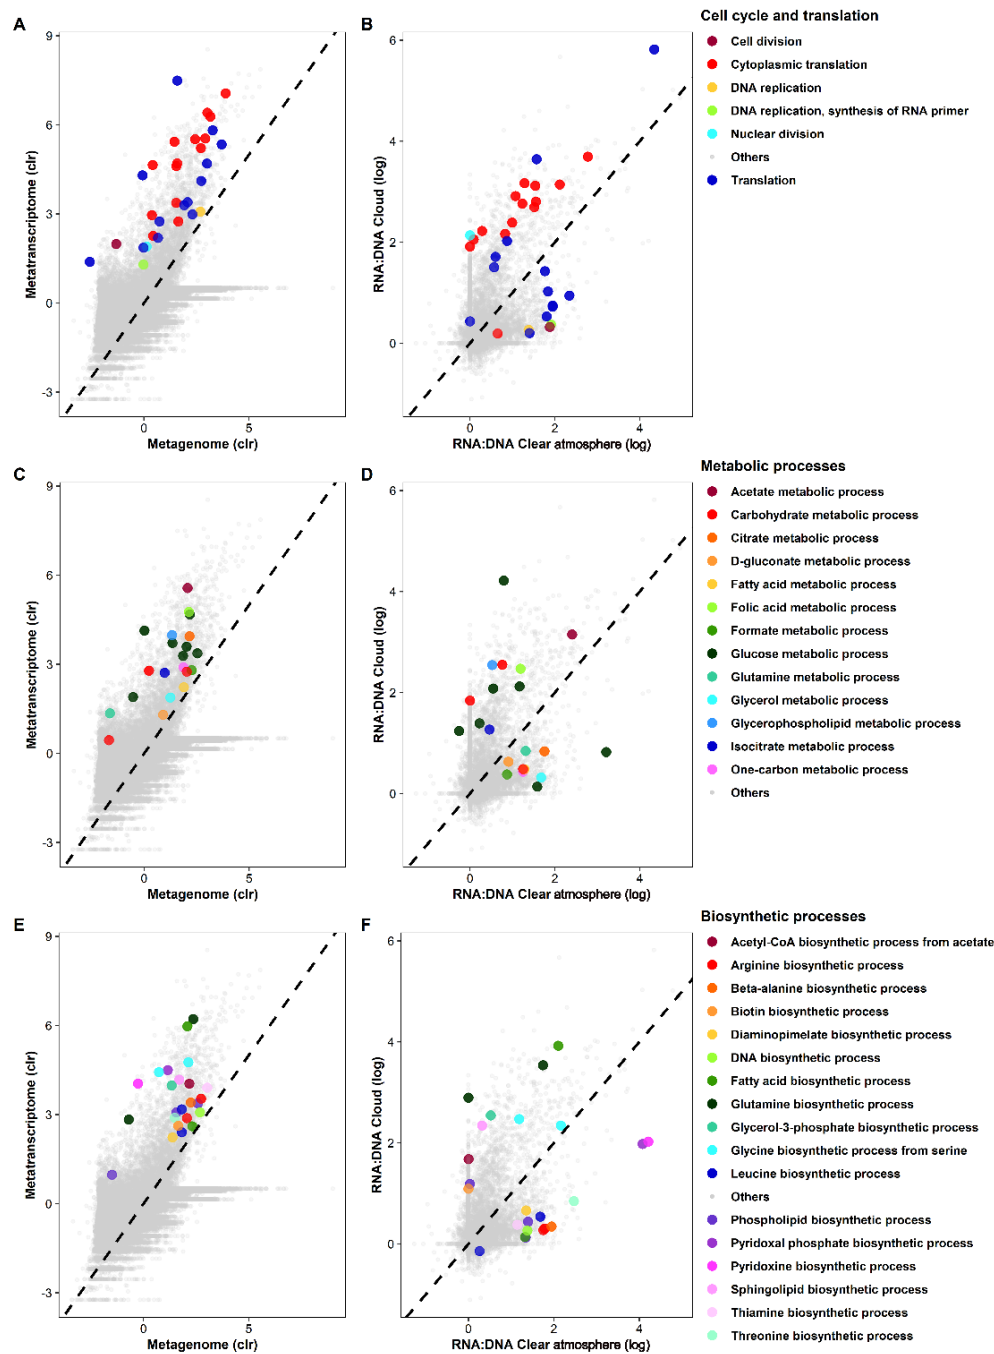

**Fig S8.**

GO terms representation in metagenomes and metatranscriptomes (**A**; **C**; **E**), and relative representation (termed as RNA:DNA) in metatranscriptomes in clouds *versus* clear conditions (**B**; **D**; **F**), for Biological Processes related to: cell cycle and translation (**A**; **B**), metabolic processes (**C**; **D**), and biosynthetic processes (**E**; **F**); clr: centered-log ratio transformation.

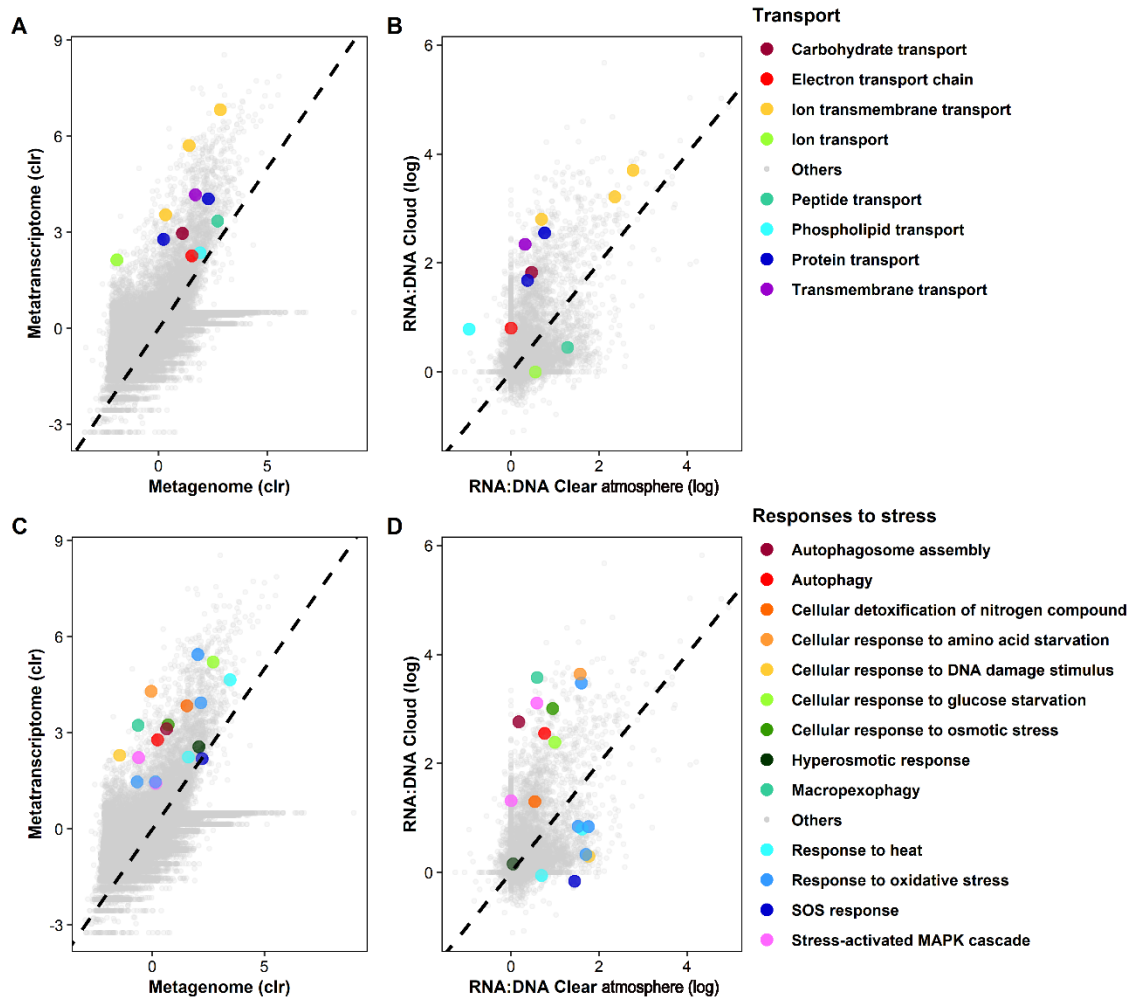

**Fig S9.**

Same as **Fig S9** for Biological Processes GO terms related to: transport (**A; B**) and responses to stress (**C; D**).

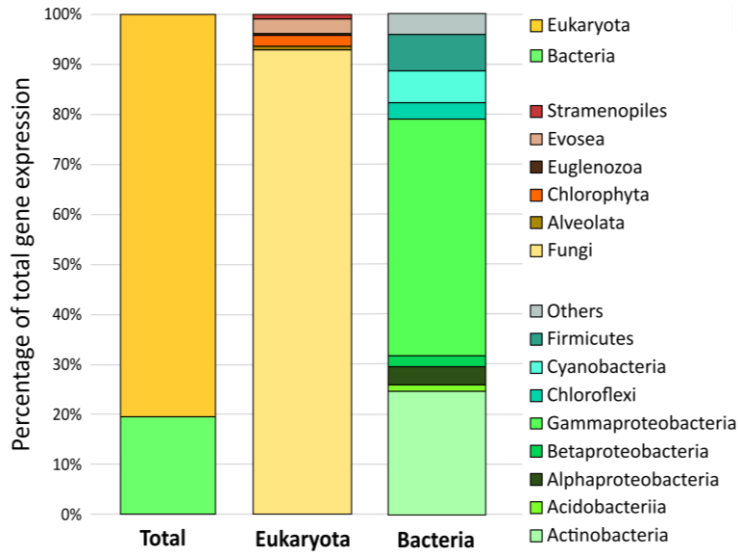

**Fig S10.** Distribution of the taxonomic affiliations associated with the 488 transcripts detected overrepresented by differential expression analysis (DEA).

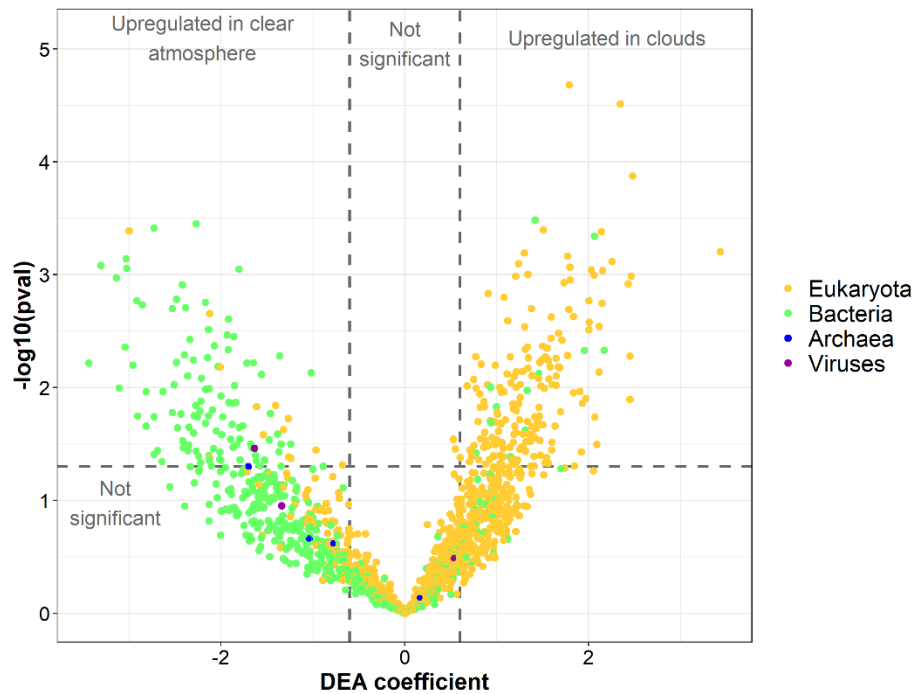

**Fig S11.** Volcano plot representing the taxonomic affiliation at the kingdom level of differentially represented transcripts between clouds (positive coefficients) and clear conditions (negative coefficients); dashed lines indicate significance thresholds of the DEA analysis.

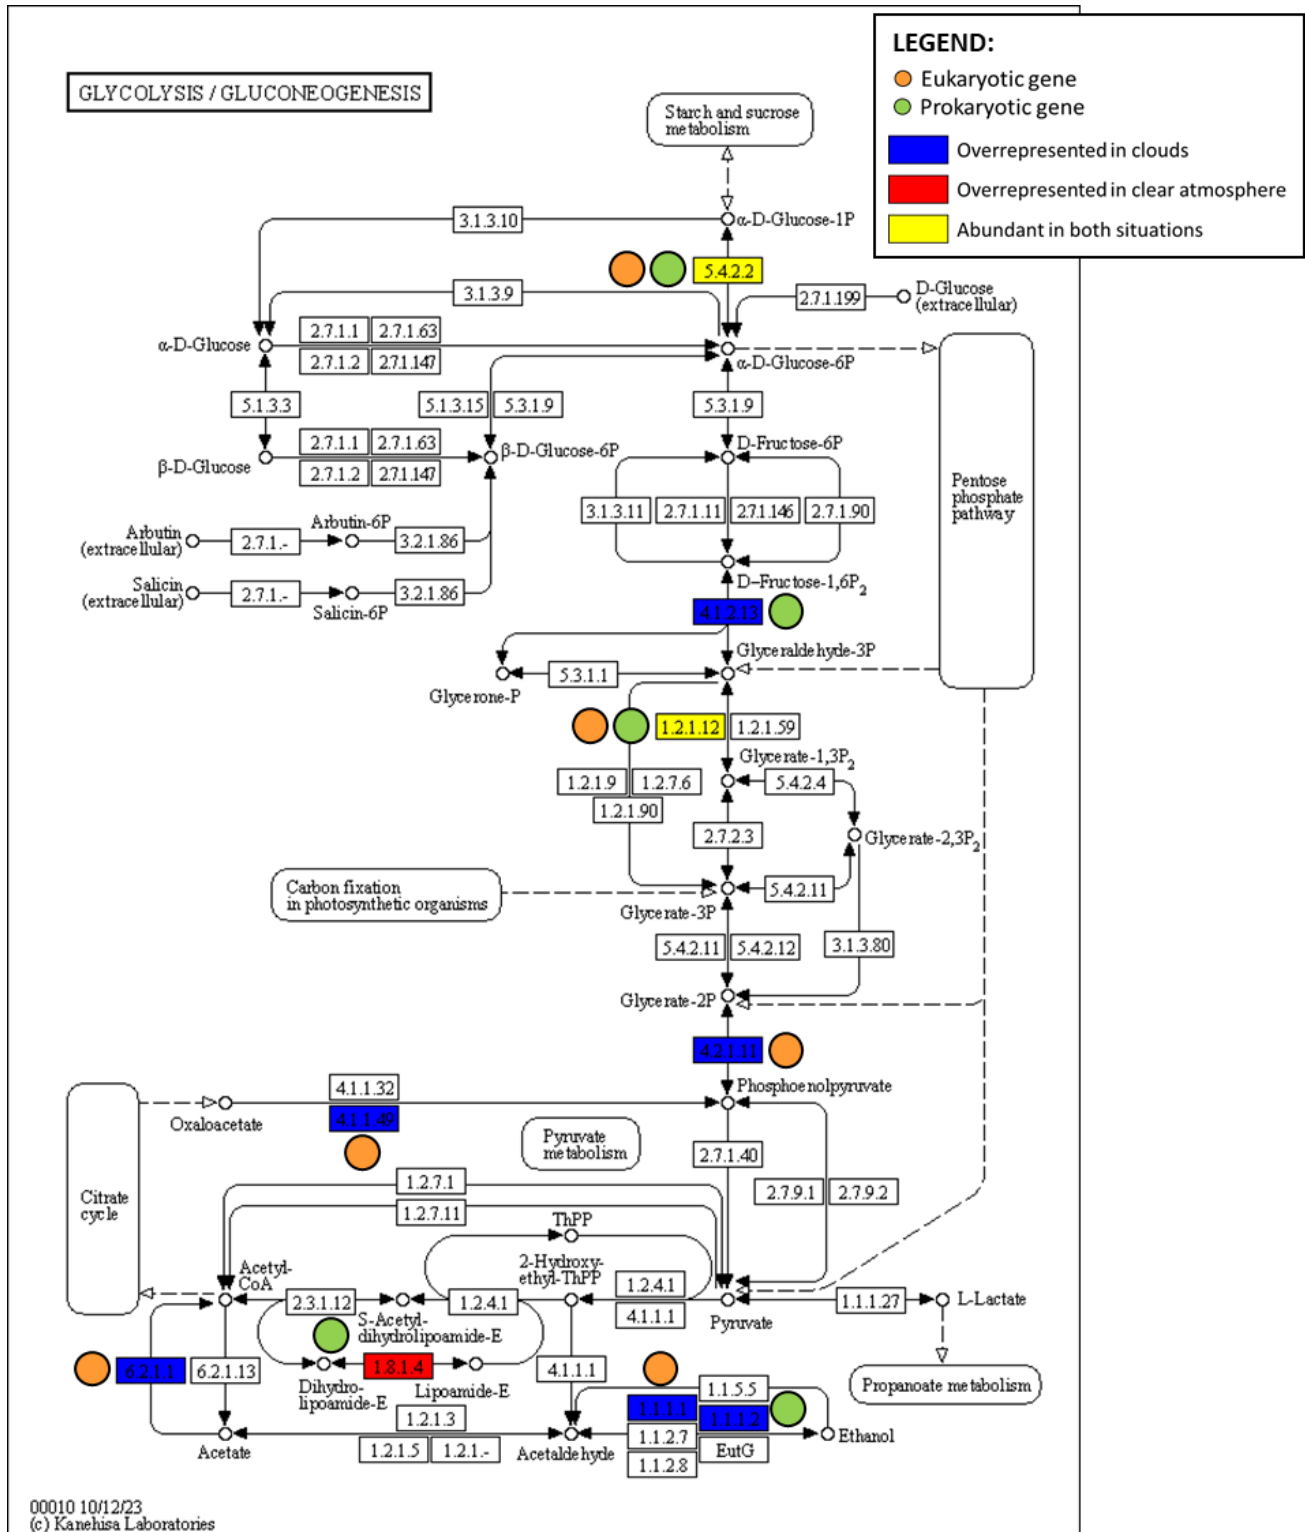

**Fig S12.**

Metabolic pathways related to glycolysis/gluconeogenesis, depicting overrepresented enzyme transcripts in clouds and/or in clear atmosphere by eukaryotes and/or by prokaryotes (from UniprotKB identifiers and KEGG database).







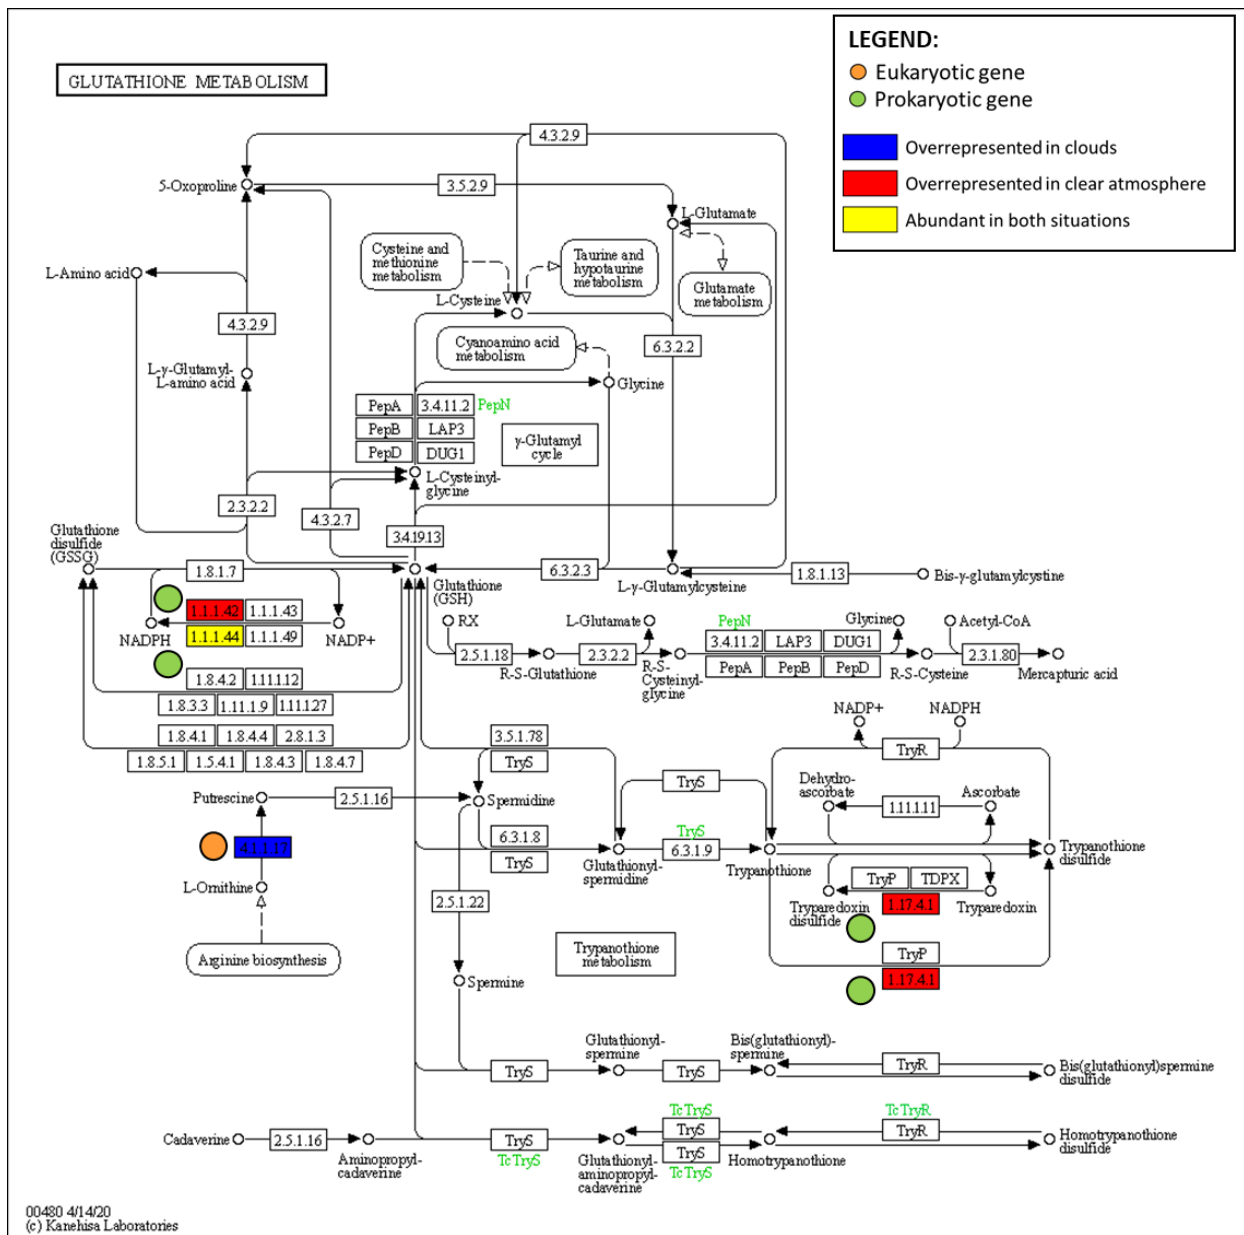

**Fig S15.**

Metabolic pathways related to glutathione metabolism, depicting overrepresented enzyme transcripts in clouds and/or in clear atmosphere by eukaryotes and/or by prokaryotes (from UniprotKB identifiers and KEGG database).

**Table S1.**

Nucleic acid concentrations in the air volumes sampled during cloudy and clear conditions, and corresponding numbers of annotated genes.

| Sample ID               | Total DNA concentration (ng.m <sup>-3</sup> of air) # | Total RNA concentration (ng.m <sup>-3</sup> of air) # | RNA to DNA concentration ratio | Number of annotated genes in MG | Number of annotated genes in MT |
|-------------------------|-------------------------------------------------------|-------------------------------------------------------|--------------------------------|---------------------------------|---------------------------------|
| <b>CLEAR ATMOSPHERE</b> |                                                       |                                                       |                                |                                 |                                 |
| 20200707AIR             | 0.73                                                  | 0.16                                                  | 0.21                           | 5 463                           | 2 237                           |
| 20200708AIR             | 0.45                                                  | 0.13                                                  | 0.28                           | 3 287                           | 2 095                           |
| 20200709AIR             | 0.29                                                  | 0.11                                                  | 0.38                           | 6 649                           | 1 676                           |
| 20200922AIR             | 0.23                                                  | 0.23                                                  | 0.98                           | 11 690                          | 2 248                           |
| 20201118AIR             | 0.04                                                  | 0.06                                                  | 1.64                           | 15 431                          | 4 471                           |
| 20201124AIR             | 0.03                                                  | 0.02                                                  | 0.53                           | -                               | -                               |
| <b>Minimum</b>          | <b>0.03</b>                                           | <b>0.02</b>                                           | <b>0.21</b>                    | <b>3 287</b>                    | <b>1 676</b>                    |
| <b>Maximum</b>          | <b>0.73</b>                                           | <b>0.23</b>                                           | <b>1.64</b>                    | <b>15 431</b>                   | <b>4 471</b>                    |
| <b>Median</b>           | <b>0.26</b>                                           | <b>0.12</b>                                           | <b>0.46</b>                    | <b>6 649</b>                    | <b>2 237</b>                    |
| <b>Mean</b>             | <b>0.29</b>                                           | <b>0.12</b>                                           | <b>0.67</b>                    | <b>8 504</b>                    | <b>2 545</b>                    |
| <b>Standard error</b>   | <b>0.27</b>                                           | <b>0.07</b>                                           | <b>0.55</b>                    | <b>4 951</b>                    | <b>1 101</b>                    |
| <b>CLOUDS</b>           |                                                       |                                                       |                                |                                 |                                 |
| 20191002CLOUD           | 0.18                                                  | 0.32                                                  | 1.77                           | 19 010                          | 2 219                           |
| 20191022CLOUD           | 0.06                                                  | 0.16                                                  | 2.70                           | 14 804                          | 3 855                           |
| 20200311CLOUD           | 0.10                                                  | 0.21                                                  | 1.98                           | 14 220                          | 985                             |
| 20200717CLOUD           | 0.11                                                  | 0.17                                                  | 1.59                           | 12 491                          | 1 477                           |
| 20201016CLOUD           | 0.05                                                  | 0.08                                                  | 1.49                           | 17 912                          | 6 134                           |
| 20201028CLOUD           | 0.05                                                  | 0.12                                                  | 2.24                           | 16 271                          | 3 368                           |
| 20201103CLOUD           | 0.12                                                  | 0.32                                                  | 2.65                           | 15 958                          | 2 737                           |
| 20201110CLOUD           | 0.13                                                  | 0.42                                                  | 3.38                           | 16 527                          | 3 110                           |
| 20201119CLOUD           | 0.09                                                  | 0.33                                                  | 3.62                           | 16 064                          | 3 406                           |
| <b>Minimum</b>          | <b>0.05</b>                                           | <b>0.08</b>                                           | <b>1.49</b>                    | <b>12 491</b>                   | <b>985</b>                      |
| <b>Maximum</b>          | <b>0.18</b>                                           | <b>0.42</b>                                           | <b>3.62</b>                    | <b>19 010</b>                   | <b>6 134</b>                    |
| <b>Median</b>           | <b>0.10</b>                                           | <b>0.21</b>                                           | <b>2.24</b>                    | <b>16 064</b>                   | <b>3 110</b>                    |
| <b>Mean</b>             | <b>0.10</b>                                           | <b>0.24</b>                                           | <b>2.38</b>                    | <b>15 917</b>                   | <b>3 032</b>                    |
| <b>Standard error</b>   | <b>0.04</b>                                           | <b>0.12</b>                                           | <b>0.76</b>                    | <b>1 934</b>                    | <b>1 496</b>                    |
| <b>P-value</b>          | <b>0.32</b>                                           | <b>0.05</b>                                           | <b>0.004**</b>                 | <b>0.01*</b>                    | <b>0.59</b>                     |

#. as inferred from quantification in the extracts, based on sampling time and air flow rate; NA: no data available; \*: significant p-value (< 0.05); \*\*: highly significant p-value (< 0.01) (Mann-Whitney test; clouds vs clear conditions).

**Table S2.**

Processing information of sequences in MGs for (A) clouds and (B) clear conditions.

| A)                                         | CLOUD<br>20191002 | CLOUD<br>20191022 | CLOUD<br>20200311 | CLOUD<br>20200717 | CLOUD<br>20201016 | CLOUD<br>20201028 | CLOUD<br>20201103 | CLOUD<br>20201110 | CLOUD<br>20201119 |
|--------------------------------------------|-------------------|-------------------|-------------------|-------------------|-------------------|-------------------|-------------------|-------------------|-------------------|
| Number of raw reads                        | 65 812 666        | 259 998 456       | 58 746 330        | 43 757 944        | 97 184 944        | 66 400 646        | 54 975 726        | 60 932 548        | 77 768 050        |
| After quality control (QC)                 | 41 675 340        | 175 692 186       | 40 113 524        | 29 200 252        | 64 669 674        | 42 495 176        | 35 964 782        | 40 917 502        | 51 587 742        |
| % removed                                  | 37                | 32                | 32                | 33                | 33                | 36                | 35                | 33                | 34                |
| Number of rRNA gene reads                  | 479 510           | 2 105 871         | 681 376           | 497 119           | 825 886           | 553 734           | 461 444           | 569 711           | 608 520           |
| % of rRNA gene reads                       | 1.15              | 1.20              | 1.70              | 1.70              | 1.28              | 1.30              | 1.28              | 1.39              | 1.18              |
| Number of non-rRNA gene reads              | 41 195 830        | 173 586 315       | 39 432 148        | 28 703 133        | 63 843 788        | 41 941 442        | 35 503 338        | 40 347 791        | 50 979 222        |
| % of non-rRNA gene reads                   | 98.85             | 98.80             | 98.30             | 98.30             | 98.72             | 98.70             | 98.72             | 98.61             | 98.82             |
| % of human reads in non-rRNA<br>gene reads | 0.11              | 0.71              | 0.02              | 0.04              | 0.08              | 0.14              | 0.07              | 0.08              | 0.09              |
| Number of assembled contigs                | 194 547           | 495 663           | 275 249           | 129 639           | 316 632           | 213 954           | 193 399           | 241 377           | 207 227           |
| Number of properly paired reads            | 2 060 240         | 17 067 006        | 3 109 058         | 1 853 656         | 5 065 598         | 3 131 000         | 3 707 712         | 3 154 518         | 2 198 260         |
| % of properly mapped reads                 | 5                 | 9.9               | 7.9               | 6.4               | 7.9               | 7.5               | 10.4              | 7.8               | 4.3               |
| Number of affiliated reads                 | 554 018           | 2 271 135         | 480 815           | 506 200           | 769 566           | 469 334           | 337 543           | 374 346           | 597 562           |
| % affiliated                               | 2.66              | 2.59              | 2.40              | 3.47              | 2.38              | 2.21              | 1.18              | 1.83              | 2.32              |
| Number of affiliated human reads           | 41 379            | 654 422           | 19 638            | 19 244            | 38 655            | 35 478            | 18 311            | 26 211            | 39 429            |
| % of human reads                           | 7.5               | 28.8              | 4.1               | 3.8               | 5                 | 7.6               | 5.4               | 7                 | 6.6               |

  

| B)                                         | CLEAR<br>20200707 | CLEAR<br>20200708 | CLEAR<br>20200709 | CLEAR<br>20200922 | CLEAR<br>20201118 | CLEAR<br>20201124 |
|--------------------------------------------|-------------------|-------------------|-------------------|-------------------|-------------------|-------------------|
| Number of raw reads                        | 47 409 014        | 30 435 818        | 44 295 022        | 41 909 288        | 40 730 342        | 41 086 722        |
| After quality control (QC)                 | 31 161 586        | 19 145 910        | 30 985 400        | 31 152 980        | 25 543 444        | 28 294 184        |
| % removed                                  | 34                | 37                | 30                | 26                | 37                | 31                |
| Number of rRNA gene reads                  | 524 095           | 361 927           | 333 292           | 437 338           | 384 484           | 305 043           |
| % of rRNA gene reads                       | 1.68              | 1.89              | 1.08              | 1.40              | 1.51              | 1.08              |
| Number of non-rRNA gene reads              | 30 637 491        | 18 783 983        | 30 652 108        | 30 715 642        | 25 158 960        | 27 989 141        |
| % of non-rRNA gene reads                   | 98.32             | 98.11             | 98.92             | 98.60             | 98.49             | 98.92             |
| % of human reads in non-rRNA<br>gene reads | 0.02              | 0.02              | 0.01              | 0.02              | 0.14              | -                 |
| Number of assembled contigs                | 140 392           | 43 627            | 99 268            | 179 815           | 101 745           | -                 |
| Number of properly paired reads            | 4 511 490         | 2 149 274         | 3 511 940         | 5 361 278         | 1 450 314         | -                 |
| % of properly mapped reads                 | 14.6              | 11.3              | 11.4              | 17.4              | 5.8               | -                 |
| Number of affiliated reads                 | 628 977           | 361 163           | 614 940           | 303 720           | 499 417           | -                 |
| % affiliated                               | 4.04              | 3.77              | 3.97              | 1.95              | 3.91              | -                 |
| Number of affiliated human reads           | 48 092            | 27 287            | 14 197            | 23 093            | 36 927            | -                 |
| % of human reads                           | 7.6               | 7.6               | 2.3               | 7.6               | 7.4               | -                 |

**Table S3.**

Processing information of sequences in MTs for (A) clouds and (B) clear conditions.

| <b>A)</b>                          | CLOUD<br>20191002 | CLOUD<br>20191022 | CLOUD<br>20200311 | CLOUD<br>20200717 | CLOUD<br>20201016 | CLOUD<br>20201028 | CLOUD<br>20201103 | CLOUD<br>20201110 | CLOUD<br>20201019 |
|------------------------------------|-------------------|-------------------|-------------------|-------------------|-------------------|-------------------|-------------------|-------------------|-------------------|
| Number of raw reads                | 93 499 990        | 186 010 124       | 82 131 152        | 81 247 584        | 79 489 694        | 85 009 094        | 110 129 198       | 69 916 188        | 195 503 428       |
| After quality control (QC)         | 64 702 194        | 94 221 480        | 61 733 384        | 60 764 224        | 54 020 462        | 64 420 980        | 71 515 884        | 50 964 222        | 132 952 184       |
| % removed                          | 31                | 49                | 25                | 25                | 32                | 24                | 35                | 27                | 32                |
| Number of rRNA reads               | 59 259 226        | 85 291 849        | 58 058 408        | 56 202 145        | 43 175 946        | 57 199 748        | 28 842 768        | 45 243 381        | 115 553 819       |
| % of rRNA reads                    | 91.59             | 90.52             | 94.05             | 92.49             | 79.93             | 88.79             | 40.33             | 88.77             | 86.91             |
| Number of non-rRNA reads           | 5 442 968         | 8 929 631         | 3 674 976         | 4 562 079         | 10 844 516        | 7 221 232         | 42 673 116        | 5 720 841         | 17 398 365        |
| % of non-rRNA reads                | 8.41              | 9.48              | 5.95              | 7.51              | 20.07             | 11.21             | 59.67             | 11.23             | 13.09             |
| % of human reads in non-rRNA reads | 0.86              | 0.05              | 0.32              | 0.42              | 0.82              | 0.46              | 89.47             | 0.29              | 0.31              |
| Number de reads properly paired    | 275 906           | 655 764           | 262 850           | 275 216           | 833 402           | 697 632           | 464 440           | 423 202           | 1 007 468         |
| % of properly mapped reads         | 4.6               | 7                 | 7                 | 5.7               | 7.5               | 8.9               | 3.9               | 7.1               | 5.6               |
| Number of affiliated reads         | 24 817 282        | 37 049 964        | 26 829 087        | 22 589 666        | 18 755 564        | 24 842 334        | 32 332 229        | 17 680 329        | 52 249 268        |
| % affiliated                       | 76.71             | 78.64             | 86.92             | 74.35             | 69.44             | 77.12             | 90.42             | 69.38             | 78.60             |
| Number of affiliated human reads   | 31 612            | 9 229             | 15 483            | 26 700            | 64 652            | 25 003            | ≈ 19 000 000      | 22 925            | 46 348            |
| % of human reads                   | 0.1               | 0.02              | 0.06              | 0.1               | 0.3               | 0.1               | ≈ 59              | 0.1               | 0.1               |

  

| <b>B)</b>                          | CLEAR<br>20200707 | CLEAR<br>20200708 | CLEAR<br>20200709 | CLEAR<br>20200922 | CLEAR<br>20201118 | CLEAR<br>20201124 |
|------------------------------------|-------------------|-------------------|-------------------|-------------------|-------------------|-------------------|
| Number of raw reads                | 71 487 464        | 116 985 074       | 96 661 644        | 65 554 022        | 76 813 684        | 68 355 146        |
| After quality control (QC)         | 49 784 022        | 63 268 244        | 56 706 232        | 48 733 804        | 54 728 858        | 54 728 858        |
| % removed                          | 30                | 46                | 41                | 26                | 29                | 20                |
| Number of rRNA reads               | 41 199 078        | 51 568 599        | 49 530 808        | 42 808 640        | 45 507 747        | 5 986 089         |
| % of rRNA reads                    | 82.76             | 81.51             | 87.35             | 87.84             | 83.15             | 12.06             |
| Number of non-rRNA reads           | 8 584 944         | 11 699 645        | 7 175 424         | 5 925 164         | 9 221 111         | 43 642 337        |
| % of non-rRNA reads                | 17.24             | 18.49             | 12.65             | 12.16             | 16.85             | 87.94             |
| % of human reads in non-rRNA reads | 1.95              | 1.37              | 12.02             | 0.2               | 0.7               | -                 |
| Number of reads properly paired    | 648 418           | 383 000           | 190 608           | 667 098           | 467 706           | -                 |
| % of properly mapped reads         | 7.6               | 3.3               | 2.7               | 10.8              | 4.9               | -                 |
| Number of affiliated reads         | 18 903 493        | 22 757 792        | 22 429 335        | 19 290 161        | 17 432 686        | -                 |
| % affiliated                       | 75.94             | 71.94             | 79.11             | 79.17             | 63.71             | -                 |
| Number of affiliated human reads   | 103 756           | 119 150           | 164 072           | 18 204            | 96 729            | -                 |
| % of human reads                   | 0.5               | 0.5               | 0.7               | 0.1               | 0.6               | -                 |

**Table S4.**

Distribution of the E.C. numbers corresponding to the 488 overrepresented transcripts in clouds or clear atmosphere.

|                                     |                                                           | Number of related gene entries up-regulated during: |                  |
|-------------------------------------|-----------------------------------------------------------|-----------------------------------------------------|------------------|
|                                     |                                                           | Clouds                                              | Clear conditions |
| <b>Oxidoreductases E.C. 1.-.-.-</b> |                                                           |                                                     |                  |
| E.C. 1.-.-.-                        | Others/ND                                                 | 2                                                   | 0                |
| E.C. 1.1.-.-                        | Acting on the CH-OH group of donors (alcohol)             | 6                                                   | 2                |
| E.C. 1.11.-.-                       | Acting on a peroxide as acceptor                          | 1                                                   | 1                |
| E.C. 1.17.-.-                       | Acting on CH or CH2 groups                                | 0                                                   | 2                |
| E.C. 1.2.-.-                        | Acting on the aldehyde or oxo group of donors             | 3                                                   | 3                |
| E.C. 1.3.-.-                        | Acting on the CH-CH group of donors                       | 1                                                   | 1                |
| E.C. 1.4.-.-                        | Acting on the CH-NH2 group of donors (aminoacids)         | 1                                                   | 1                |
| E.C. 1.8.-.-                        | Acting on a sulfur group of donors                        | 0                                                   | 1                |
| <b>Total</b>                        |                                                           | <b>14</b>                                           | <b>11</b>        |
| <b>Transferases E.C. 2.-.-.-</b>    |                                                           |                                                     |                  |
| 2.-.-.-                             | Others/ND                                                 | 0                                                   | 0                |
| 2.1.-.-                             | Transferring one-carbon groups (Methyltransferases)       | 1                                                   | 1                |
| 2.2.-.-                             | Transferring aldehyde or ketonic groups                   | 1                                                   | 1                |
| 2.3.-.-                             | Acytransferases                                           | 5                                                   | 2                |
| 2.4.-.-                             | Glycosyltransferases                                      | 7                                                   | 1                |
| 2.6.-.-                             | Transferring nitrogenous groups                           | 0                                                   | 1                |
| 2.7.-.-                             | Transferring phosphorus-containing groups                 | 10                                                  | 13               |
| 2.8.-.-                             | Transferring sulfur-containing groups                     | 0                                                   | 1                |
| <b>Total</b>                        |                                                           | <b>24</b>                                           | <b>20</b>        |
| <b>Hydrolases E.C. 3.-.-.-</b>      |                                                           |                                                     |                  |
| 3.-.-.-                             | Others/ND                                                 | 3                                                   | 0                |
| 3.1.-.-                             | Acting on ester bonds (Esterases)                         | 4                                                   | 0                |
| 3.2.-.-                             | Glycosylases                                              | 5                                                   | 2                |
| 3.4.-.-                             | Acting on peptide bonds (peptidases)                      | 9                                                   | 2                |
| 3.5.-.-                             | Acting on carbon-nitrogen bonds, other than peptide bonds | 1                                                   | 0                |
| 3.6.-.-                             | Acting on acid anhydrides (Polyphosphatases)              | 18                                                  | 7                |
| 3.7.-.-                             | Acting on carbon-carbon bonds                             | 0                                                   | 0                |
| 3.13.-.-                            | C-S hydrolases                                            | 0                                                   | 1                |
| <b>Total</b>                        |                                                           | <b>40</b>                                           | <b>12</b>        |
| <b>Lyases E.C. 4.-.-.-</b>          |                                                           |                                                     |                  |
| 4.-.-.-                             | Others/ND                                                 | 0                                                   | 0                |
| 4.1.-.-                             | Carbon-carbon lyases (Decarboxylases)                     | 4                                                   | 3                |
| 4.2.-.-                             | Carbon-oxygen lyases (Dehydratases)                       | 3                                                   | 8                |
| 4.3.-.-                             | Carbon-nitrogen lyases                                    | 0                                                   | 2                |
| 4.6.-.-                             | Phosphorus-oxygen lyases                                  | 1                                                   | 0                |
| <b>Total</b>                        |                                                           | <b>8</b>                                            | <b>13</b>        |
| <b>Isomerases E.C. 5.-.-.-</b>      |                                                           |                                                     |                  |
| 5.-.-.-                             | Others/ND                                                 | 0                                                   | 0                |
| 5.1.-.-                             | Racemases and epimerases                                  | 1                                                   | 0                |
| 5.4.-.-                             | Intramolecular transferases                               | 2                                                   | 2                |
| 5.5.-.-                             | Intramolecular lyases                                     | 1                                                   | 1                |
| 5.6.-.-                             | Isomerases altering macromolecular conformation           | 0                                                   | 3                |
| <b>Total</b>                        |                                                           | <b>4</b>                                            | <b>6</b>         |
| <b>Ligases E.C. 6.-.-.-</b>         |                                                           |                                                     |                  |
| 6.-.-.-                             | Others/ND                                                 | 0                                                   | 0                |
| 6.1.-.-                             | Forming carbon-oxygen bonds                               | 0                                                   | 3                |
| 6.2.-.-                             | Forming carbon-sulfur bonds                               | 2                                                   | 0                |
| 6.3.-.-                             | Forming carbon-nitrogen bonds                             | 2                                                   | 4                |
| 6.4.-.-                             | Forming carbon-carbon bonds                               | 0                                                   | 2                |
| <b>Total</b>                        |                                                           | <b>4</b>                                            | <b>9</b>         |
| <b>Translocases E.C. 7.-.-.-</b>    |                                                           |                                                     |                  |
| 7.-.-.-                             | Others/ND                                                 | 0                                                   | 0                |
| 7.1.-.-                             | Catalysing the translocation of hydrons                   | 21                                                  | 9                |
| 7.2.-.-                             | Catalysing the translocation of inorganic cations         | 0                                                   | 1                |
| 7.4.-.-                             | Catalysing the translocation amino acids and peptides     | 0                                                   | 4                |
| <b>Total</b>                        |                                                           | <b>21</b>                                           | <b>14</b>        |
| <b>TOTAL</b>                        |                                                           | <b>115</b>                                          | <b>85</b>        |

### Other Supplementary Materials (separate electronic files):

- **Data S1.** Read counts affiliated with Bacteria in MGs and MTs based on taxonomy annotations in Kraken's plusPF database, at various taxonomic levels. The samples are named as "A" for clear conditions or "C" for clouds, respectively, followed by the sampling date as "yyyymmdd".
- **Data S2.** Read counts affiliated with Eukaryota in MGs and MTs based on taxonomy annotations in Kraken's plusPF database, at various taxonomic levels. The samples are named as "A" for clear conditions or "C" for clouds, respectively, followed by the sampling date as "yyyymmdd".
- **Data S3.** Taxon-based differential expression analysis (DEA), from bacterial and Eukaryotic families and genera representation in MTs *versus* MGs, all samples considered without distinction between atmospheric conditions. Value: factor of reference for which positive DEA coefficients indicate overrepresentation; coef: DEA coefficient from MTXmodel; stderr: standard deviation of the DEA coefficient; N: total number of samples considered; N.not.0: number of samples with corresponding reads number >0; pval: p-value associated with the DEA coefficient. The taxa significantly more represented in MTs than in MGs are highlighted in green (positive coefficient and p-value < 0.05).
- **Data S4.** List of the 488 overrepresented transcripts based on differential expression analysis (DEA), without distinction between atmospheric conditions, and proteins, genes, organisms, GO terms and E.C. numbers associated with them. Value: factor of reference for which positive DEA coefficients indicate overrepresentation; coef: DEA coefficient from MTXmodel; stderr: standard deviation of the DEA coefficient; N: total number of samples considered; N.not.0: number of samples with corresponding reads number >0; pval: p-value associated with the DEA coefficient.
- **Data S5.** Average DEA coefficients of GO terms associated with overrepresented transcripts, all samples considered without distinction between atmospheric conditions. Positive coefficients are highlighted in green and indicate overrepresented GO terms. Biological Processes are represented as **Fig 2**.
- **Data S6.** List of the 320 transcripts differentially represented between clouds and clear atmosphere, based on differential expression analysis (DEA), and proteins, genes, organisms, GO terms and E.C. numbers associated with them. Value: factor of reference for which positive DEA coefficients indicate overrepresentation; coef: DEA coefficient from MTXmodel; stderr: standard deviation of the DEA coefficient; N: total number of samples considered; N.not.0: number of samples with corresponding reads number >0; pval: p-value associated with the DEA coefficient.
- **Data S7.** Average DEA coefficients of GO terms associated with differentially represented transcripts between clouds and clear atmosphere. Positive coefficients are highlighted in green and indicate GO terms overrepresented in clouds. Biological Processes are represented in **Fig 4D**.
